# Supplementary figures and images for: Slowing the body slows down time perception
Source: eLife journal article supplement (doi:10.7554/elife.63607), 2021-04-08

**A**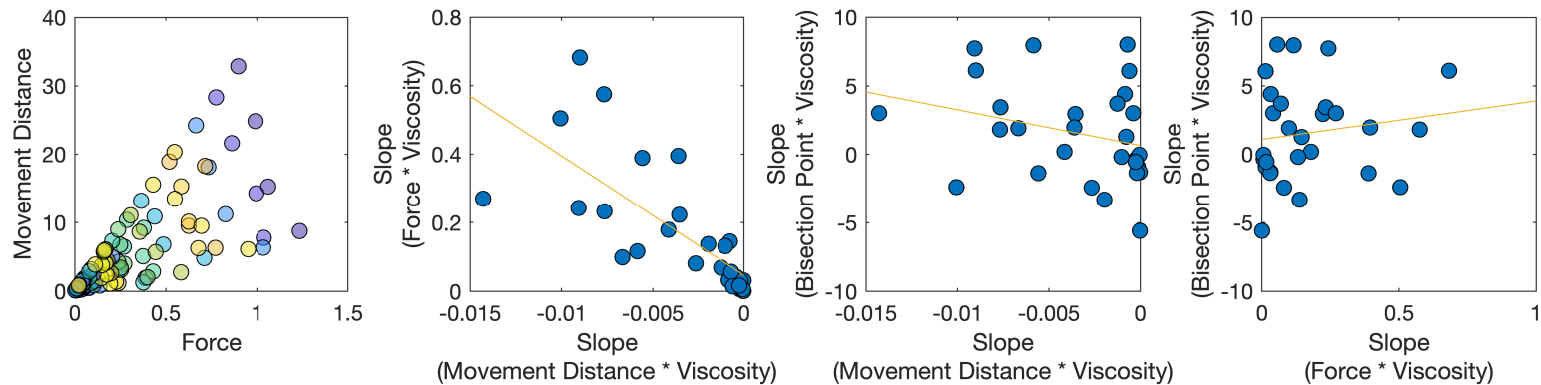**B**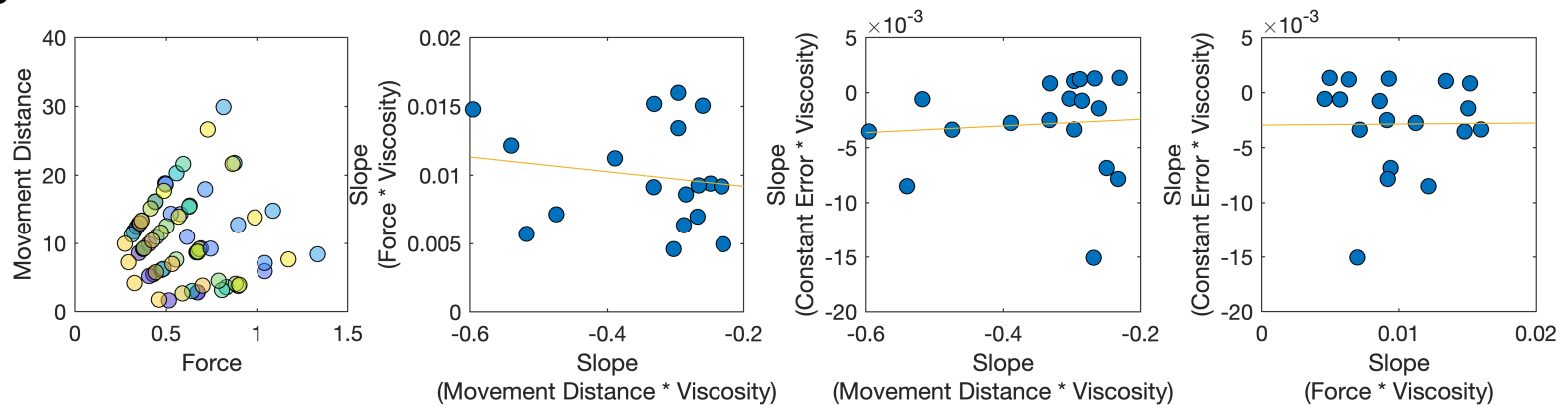

Supplement: supp [file elife-63607-supp-v1.zip]

**A**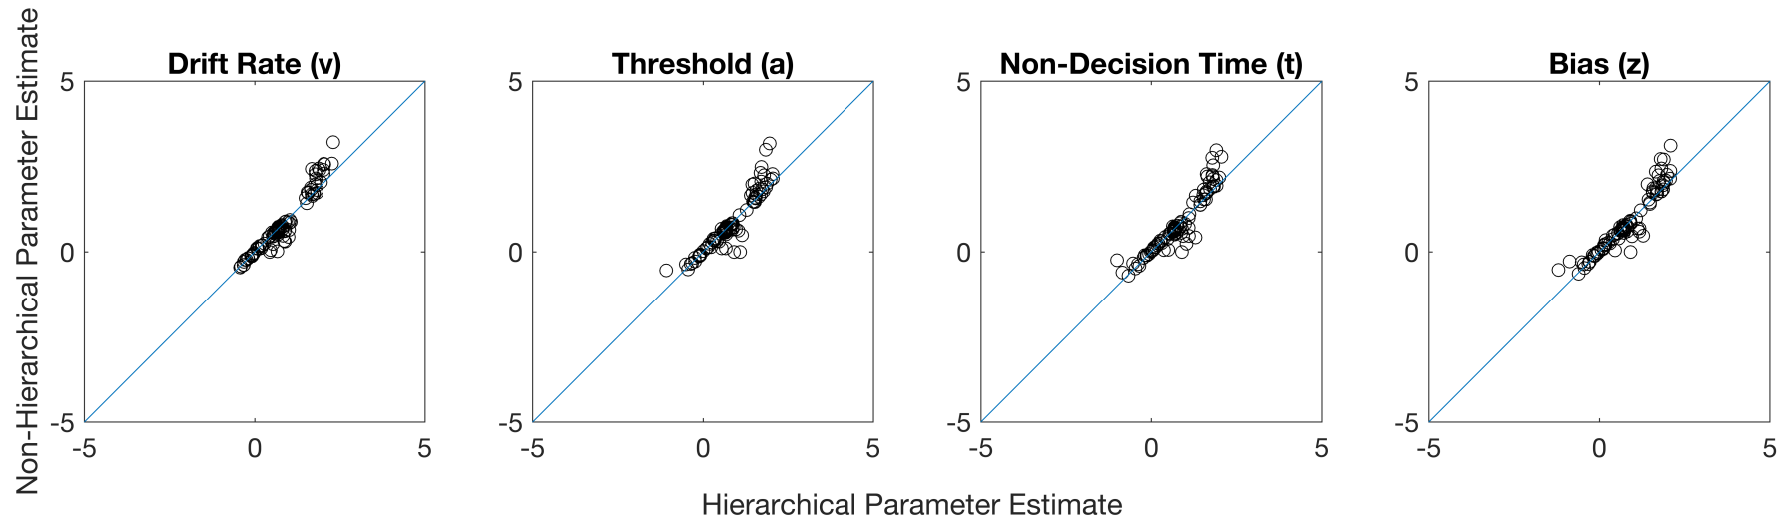**B**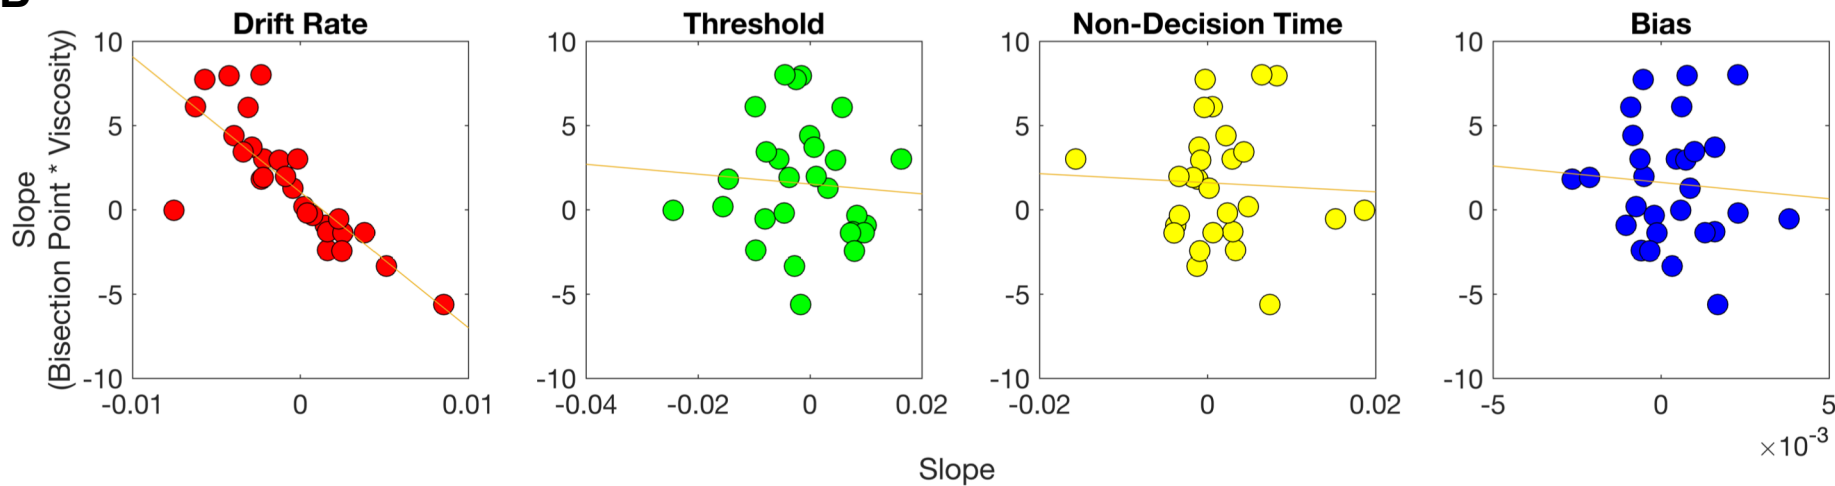

Supplement: supp [file elife-63607-supp-v1.zip]

**A**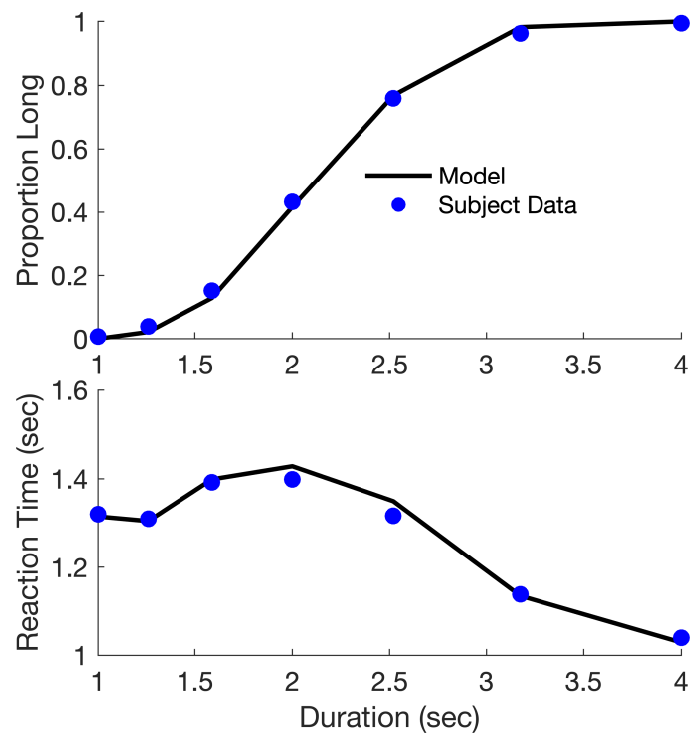**C**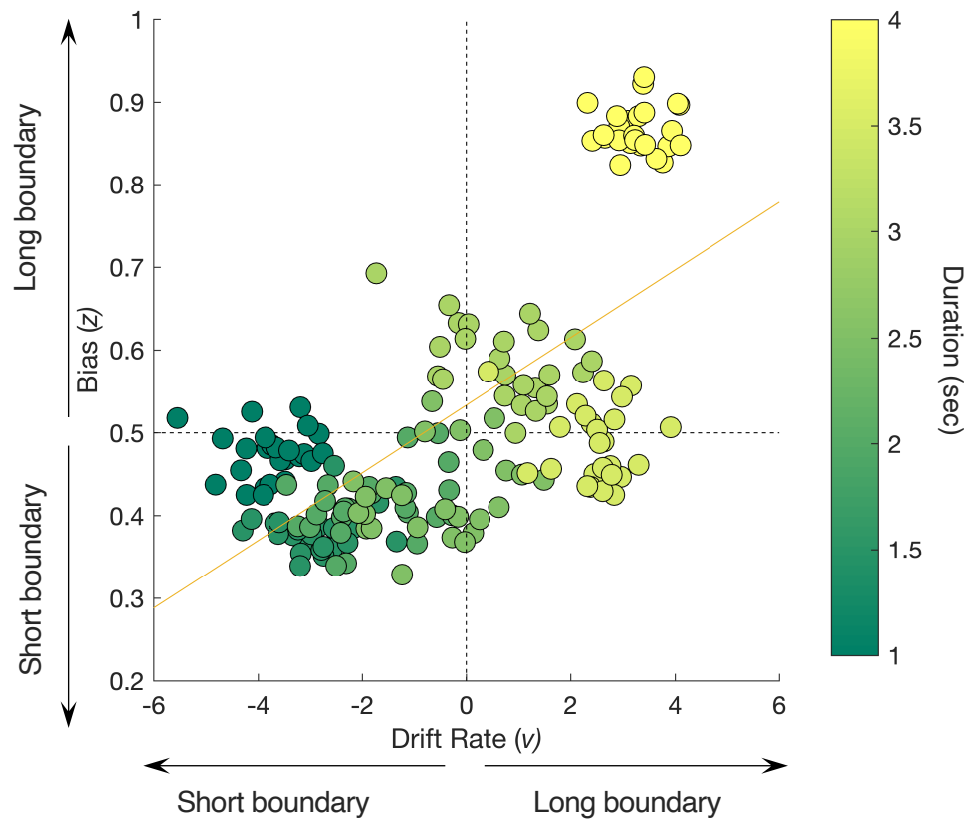**B**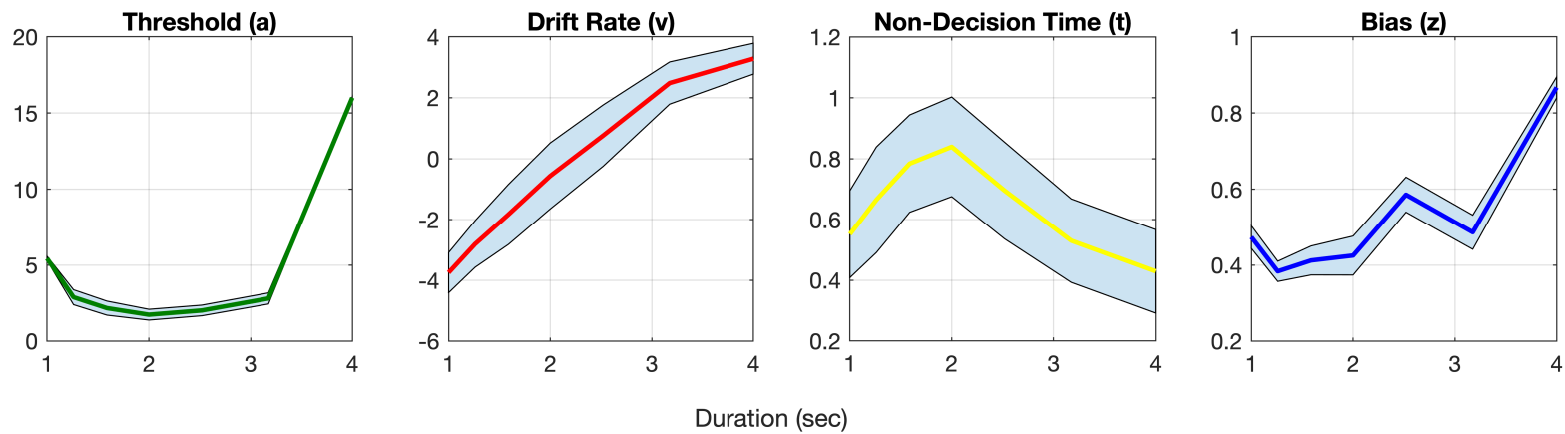

Supplement: supp [file elife-63607-supp-v1.zip]

**A**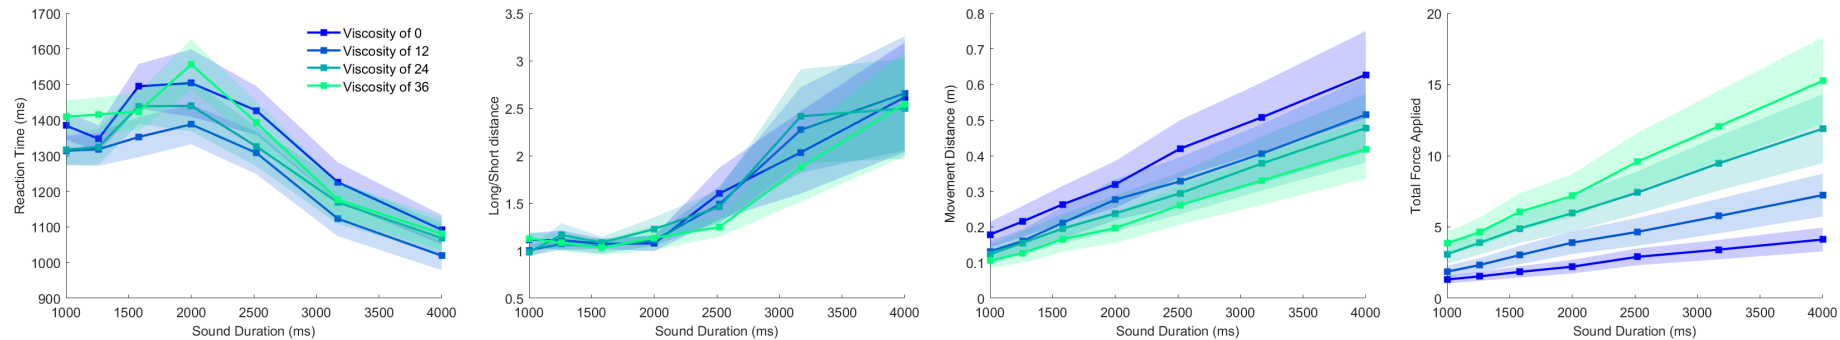**B**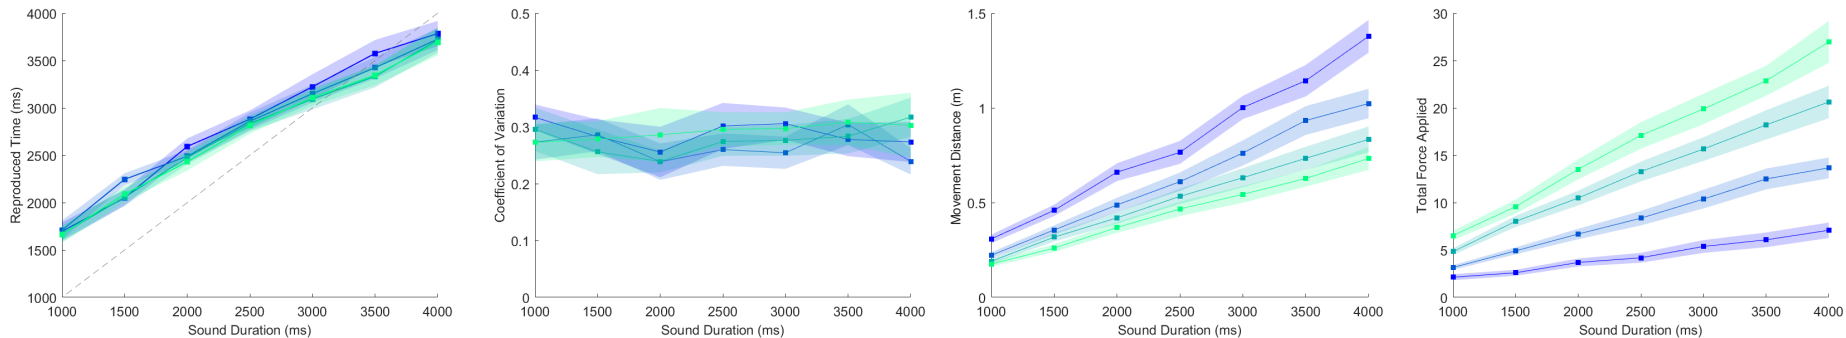

Supplement: supp [file elife-63607-supp-v1.zip]
